# Supplementary material
Source: PubMed Central journal article supplement (PMC1472417)

Height

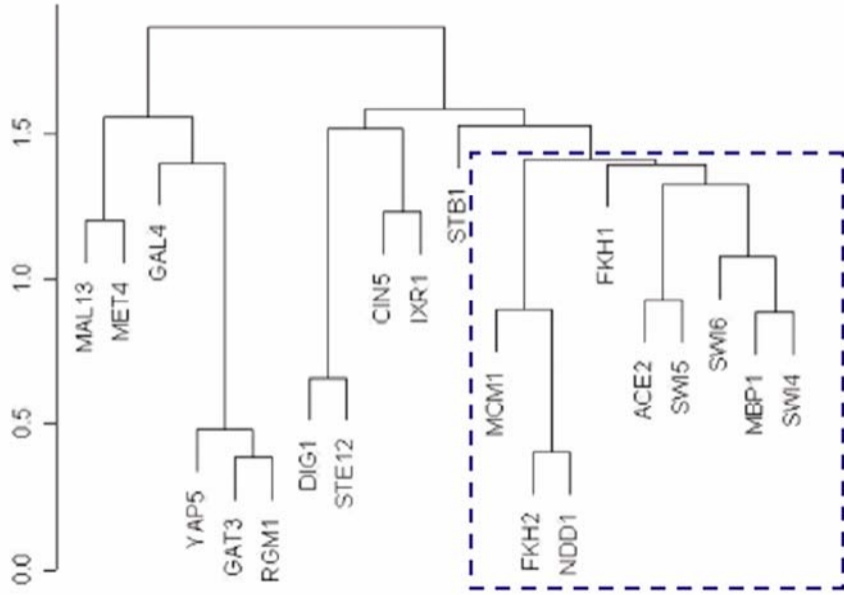

Supplement: pnas_0600164103_2.pdf [file pnas_0600164103_2.pdf]
